# Supplementary material for: Cyclohexane-1,3-dione Derivatives as Future Therapeutic Agents for NSCLC: QSAR Modeling, In Silico ADME-Tox Properties, and Structure-Based Drug Designing Approach
Source: PubMed Central journal article supplement — ACS Omega. 2023 Jan 19;8(4):4294–319. doi: 10.1021/acsomega.2c07585 (PMC9893467; doi:10.1021/acsomega.2c07585), 2023-01-19
Supplement: ao2c07585_si_001.pdf [file ao2c07585_si_001.pdf]

## Supporting Information for the paper

### Cyclohexane-1,3-Dione derivatives as Future Therapists for NSCLC: QSAR Modeling, in silico ADME-Tox Properties, and structure-based drug designing approach

Ossama Daoui<sup>\*1</sup>, Souad Elkhatabi<sup>\*1</sup>, Mohamed Bakhouch<sup>2</sup>, Salah Belaidi<sup>3</sup>, Richie R. Bhandare<sup>4,5\*</sup>, Afzal Basha Shaik<sup>6</sup>, Suraj N. Mali<sup>7</sup>, Samir Chtita<sup>\*8</sup>

<sup>1</sup>Laboratory of Engineering, Systems and Applications, National School of Applied Sciences, Sidi Mohamed Ben Abdellah-Fez University, BP Box 72, Fez, Morocco.

<sup>2</sup>Laboratory of Bioorganic Chemistry, Department of Chemistry, Faculty of Sciences, Chouaib Doukkali University, P.O. Box 24, 24000 El Jadida, Morocco.

<sup>3</sup>Group of Computational and Medicinal Chemistry, LMCE Laboratory, University of Biskra, BP 145 Biskra 707000, Algeria.

<sup>4</sup>Department of Pharmaceutical Sciences, College of Pharmacy & Health Sciences

<sup>5</sup>Center of Medical and Bio-allied Health Sciences Research, Ajman University, P O Box 346, Ajman, United Arab Emirates.

<sup>6</sup>St. Mary's College of Pharmacy, Affiliated to Jawaharlal Nehru Technological University Kakinada, Chebrolu, Guntur, Andhra Pradesh-522212, India.

<sup>7</sup>Department of Pharmacy, Government College of Pharmacy, Karad, Affiliated to Shivaji University, Kolhapur, Maharashtra, India.

<sup>8</sup>Laboratory of Analytical and Molecular Chemistry, Faculty of Sciences Ben M'Sik, Hassan II University of Casablanca, B.P 7955, Casablanca, Morocco.

---

**\*Corresponding authors:** Ossama Daoui (OD) [ossama.daoui@usmba.ac.ma](mailto:ossama.daoui@usmba.ac.ma) (orcid.org/0000-0003-2265-7903); Souad Elkhatabi (SE) [souad.elkhatabi@usmba.ac.ma](mailto:souad.elkhatabi@usmba.ac.ma); Samir Chtita (SC) [samirchtita@gmail.com](mailto:samirchtita@gmail.com) (orcid.org/0000-0003-2344-5101); Richie R. Bhandare (RRB) [r.bhandareh@ajman.ac.ae](mailto:r.bhandareh@ajman.ac.ae)

## Table of Contents

|                                                                                                                                                                                                                             |     |
|-----------------------------------------------------------------------------------------------------------------------------------------------------------------------------------------------------------------------------|-----|
| <b>Table S1.</b> Optimized molecular structures of cyclohexane-1,3-dione derivatives and in vitro data points of their pIC <sub>50</sub> (-LogIC <sub>50</sub> ) inhibitory activity against the NSCLC cell line H460. .... | S3  |
| <b>Table S2.</b> Computed molecular descriptors used in this study to generate the predictive QSAR model.....                                                                                                               | S6  |
| <b>Table S2.</b> continuation .....                                                                                                                                                                                         | S7  |
| <b>Table S3.</b> Correlation matrix generated by PCA analyses.....                                                                                                                                                          | S9  |
| <b>Table S4.</b> Y-randomization test .....                                                                                                                                                                                 | S10 |
| <b>Table S5.</b> Similarity between the pIC <sub>50</sub> range of in vitro-observed cyclohexan-1,3-dione derivatives and that predicted in silico using MLR-QSAR and ANN-QSAR models.. ....                                | S12 |
| <b>Table S6.</b> Molecular descriptor sizes and pIC <sub>50</sub> range predicted using the optimal QSAR model for the designed novel cyclohexan-1,3-dione derivatives.....                                                 | S13 |
| <b>Figure S1.</b> Heterocyclic structures of the 36 designed compounds (H01-H36) based on scaffold 6d.....                                                                                                                  | S15 |
| <b>Figure S2.</b> The key interactions predicted from MM-GBSA simulation between 3LQ8 and the designed compounds (A) H01, (B) H06, (C) H12, (D) H18, (E) H20, (F) H21, (G) H24, (H) H30, (I) H36. ....                      | S20 |

**Table S1.** Optimized molecular structures of cyclohexane-1,3-dione derivatives and in vitro data points of their  $pIC_{50}$  ( $-\text{Log}IC_{50}$ ) inhibitory activity against the NSCLC cell line H460.

|                                                                                    |                 |                                                                                    |                 |                                                                                      |                 |                                                                                      |                 |                                                                                      |                 |
|------------------------------------------------------------------------------------|-----------------|------------------------------------------------------------------------------------|-----------------|--------------------------------------------------------------------------------------|-----------------|--------------------------------------------------------------------------------------|-----------------|--------------------------------------------------------------------------------------|-----------------|
| 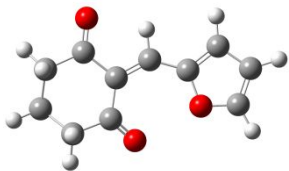  |                 |   |                 |   |                 |   |                 |   |                 |
| 3a                                                                                 | $pIC_{50}=5.26$ | 3b                                                                                 | $pIC_{50}=6.41$ | 5a                                                                                   | $pIC_{50}=5.38$ | 5b                                                                                   | $pIC_{50}=5.93$ | 5c                                                                                   | $pIC_{50}=6.59$ |
|   |                 |   |                 |   |                 |   |                 |   |                 |
| 5d                                                                                 | $pIC_{50}=6.44$ | 6a                                                                                 | $pIC_{50}=5.24$ | 6b                                                                                   | $pIC_{50}=6.09$ | 6c                                                                                   | $pIC_{50}=6.43$ | 6d                                                                                   | $pIC_{50}=6.38$ |
|  |                 |  |                 |  |                 |  |                 |  |                 |
| 8a                                                                                 | $pIC_{50}=6.55$ | 8b                                                                                 | $pIC_{50}=6.54$ | 10a                                                                                  | $pIC_{50}=5.12$ | 10b                                                                                  | $pIC_{50}=5.42$ | 10c                                                                                  | $pIC_{50}=6.37$ |

|                                                                                     |                                                                                     |                                                                                       |                                                                                       |                                                                                       |
|-------------------------------------------------------------------------------------|-------------------------------------------------------------------------------------|---------------------------------------------------------------------------------------|---------------------------------------------------------------------------------------|---------------------------------------------------------------------------------------|
|    |    |    |    |    |
| 10d   pIC <sub>50</sub> =6.24                                                       | 12a   pIC <sub>50</sub> =5.97                                                       | 12b   pIC <sub>50</sub> =6.44                                                         | 14   pIC <sub>50</sub> =5.17                                                          | 16a   pIC <sub>50</sub> =5.27                                                         |
|    |    |    |    |    |
| 16b   pIC <sub>50</sub> =5.14                                                       | 16c   pIC <sub>50</sub> =6.17                                                       | 17a   pIC <sub>50</sub> =5.20                                                         | 17b   pIC <sub>50</sub> =5.34                                                         | 17c   pIC <sub>50</sub> =5.58                                                         |
|    |    |    |    |    |
| 17d   pIC <sub>50</sub> =5.78                                                       | 17e   pIC <sub>50</sub> =6.29                                                       | 17f   pIC <sub>50</sub> =6.48                                                         | 19a   pIC <sub>50</sub> =5.08                                                         | 19b   pIC <sub>50</sub> =5.64                                                         |
|  |  |  |  |  |

|                                                                                   |                         |                                                                                   |                         |                                                                                     |                         |                                                                                     |                         |                                                                                     |                         |
|-----------------------------------------------------------------------------------|-------------------------|-----------------------------------------------------------------------------------|-------------------------|-------------------------------------------------------------------------------------|-------------------------|-------------------------------------------------------------------------------------|-------------------------|-------------------------------------------------------------------------------------|-------------------------|
| 19c                                                                               | pIC <sub>50</sub> =6.49 | 20a                                                                               | pIC <sub>50</sub> =5.12 | 20b                                                                                 | pIC <sub>50</sub> =5.24 | 20c                                                                                 | pIC <sub>50</sub> =6.46 | 21a                                                                                 | pIC <sub>50</sub> =5.19 |
| 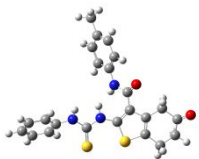 |                         |  |                         |  |                         |  |                         |  |                         |
| 21b                                                                               | pIC <sub>50</sub> =5.79 | 21c                                                                               | pIC <sub>50</sub> =5.06 | 22a                                                                                 | pIC <sub>50</sub> =5.08 | 22b                                                                                 | pIC <sub>50</sub> =5.63 | 22c                                                                                 | pIC <sub>50</sub> =6.74 |

**Table S2.** Computed molecular descriptors used in this study to generate the predictive QSAR model.

|     | MV     | n    | d    | ae    | Stretch | Bend  | S-B   | Tor   | NVDW  | VDW   | Dipole | MW     | HBA | HBD | RoB | LogP | CCA    |
|-----|--------|------|------|-------|---------|-------|-------|-------|-------|-------|--------|--------|-----|-----|-----|------|--------|
| 3a  | 150.00 | 1.59 | 1.27 | 20.16 | 1.33    | 17.94 | 0.14  | 4.68  | 1.93  | 9.88  | 4.09   | 190.06 | 3   | 0   | 1   | 1.12 | 367.60 |
| 3b  | 156.70 | 1.65 | 1.32 | 22.58 | 1.73    | 15.10 | 0.33  | 12.37 | 3.80  | 10.30 | 4.82   | 206.04 | 2   | 0   | 1   | 1.59 | 374.07 |
| 5a  | 188.50 | 1.68 | 1.43 | 28.21 | 1.28    | 21.24 | 0.08  | 9.12  | 1.80  | 9.36  | 2.92   | 270.05 | 4   | 1   | 2   | 1.50 | 434.23 |
| 5b  | 229.40 | 1.38 | 1.38 | 33.75 | 2.39    | 26.65 | 0.22  | 17.30 | 2.81  | 14.69 | 2.31   | 317.07 | 4   | 1   | 3   | 3.14 | 511.54 |
| 5c  | 196.30 | 1.71 | 1.45 | 30.45 | 1.54    | 17.36 | 0.24  | 18.90 | 3.18  | 9.61  | 3.68   | 286.02 | 3   | 1   | 2   | 1.97 | 439.67 |
| 5d  | 236.10 | 1.70 | 1.41 | 36.16 | 2.60    | 22.44 | 0.35  | 27.69 | 3.87  | 14.86 | 2.83   | 333.05 | 3   | 1   | 4   | 3.61 | 516.51 |
| 6a  | 186.20 | 1.62 | 1.37 | 26.07 | 1.93    | 17.25 | 0.04  | 11.97 | 1.94  | 13.15 | -2.58  | 256.09 | 5   | 1   | 2   | 0.31 | 426.93 |
| 6b  | 180.00 | 1.63 | 1.42 | 25.24 | 0.71    | 14.14 | -0.12 | -4.16 | -4.65 | 7.74  | -2.40  | 257.07 | 5   | 1   | 2   | 0.63 | 438.95 |
| 6c  | 197.00 | 1.64 | 1.31 | 28.26 | 0.79    | 6.14  | -0.03 | 5.36  | -4.64 | 9.48  | 1.88   | 258.08 | 3   | 1   | 2   | 3.15 | 448.79 |
| 6d  | 190.80 | 1.65 | 1.35 | 27.44 | 0.71    | 6.83  | -0.04 | 4.96  | -5.00 | 6.78  | 0.01   | 259.07 | 3   | 1   | 2   | 2.85 | 445.32 |
| 8a  | 234.50 | 1.75 | 1.44 | 37.72 | 3.59    | 33.75 | -0.25 | 14.76 | 5.50  | 17.70 | 1.00   | 339.04 | 2   | 0   | 2   | 4.15 | 506.16 |
| 8b  | 242.30 | 1.77 | 1.46 | 39.97 | 3.88    | 29.83 | -0.11 | 24.65 | 6.52  | 17.95 | 1.68   | 355.02 | 1   | 0   | 2   | 4.62 | 509.55 |
| 10a | 141.50 | 1.76 | 1.52 | 23.01 | 0.83    | 28.43 | -0.07 | -4.46 | -0.43 | 5.74  | -0.74  | 216.10 | 5   | 2   | 1   | 1.97 | 349.98 |
| 10b | 291.50 | 1.68 | 1.26 | 43.72 | 2.89    | 30.36 | 0.03  | -2.33 | 3.39  | 20.93 | -0.27  | 368.16 | 5   | 1   | 4   | 5.64 | 587.82 |
| 10c | 149.50 | 1.81 | 1.55 | 25.56 | 1.14    | 22.30 | 0.09  | 3.15  | 0.32  | 6.86  | -0.36  | 232.08 | 4   | 2   | 1   | 2.73 | 359.77 |
| 10d | 299.50 | 1.71 | 1.28 | 46.27 | 3.06    | 23.92 | 0.12  | 12.60 | 3.83  | 20.84 | -0.06  | 384.14 | 4   | 1   | 4   | 6.37 | 594.24 |
| 12a | 143.80 | 1.70 | 1.51 | 21.93 | 1.12    | 29.12 | -0.02 | -5.63 | -0.15 | 6.46  | 4.27   | 218.07 | 5   | 1   | 1   | 2.89 | 378.97 |
| 12b | 151.80 | 1.75 | 1.54 | 24.47 | 1.20    | 21.55 | 0.09  | 6.44  | -0.13 | 7.16  | 4.73   | 234.05 | 4   | 1   | 1   | 3.62 | 388.44 |
| 14  | 139.50 | 1.56 | 1.21 | 17.91 | 1.19    | 4.45  | 0.27  | 5.85  | 0.76  | 11.68 | 3.20   | 168.08 | 3   | 0   | 2   | 0.41 | 369.16 |
| 16a | 164.00 | 1.70 | 1.31 | 25.11 | 1.46    | 6.60  | 0.26  | -4.60 | 2.13  | 14.06 | 2.42   | 215.10 | 3   | 1   | 2   | 2.00 | 413.82 |
| 16b | 180.20 | 1.68 | 1.27 | 27.03 | 1.52    | 6.76  | 0.26  | -5.33 | 1.93  | 14.72 | 2.41   | 229.11 | 3   | 1   | 2   | 2.50 | 445.52 |
| 16c | 188.00 | 1.67 | 1.30 | 27.76 | 1.73    | 9.07  | 0.32  | -4.60 | 2.52  | 16.81 | 2.41   | 245.11 | 4   | 1   | 3   | 2.10 | 459.84 |
| 17a | 213.70 | 1.70 | 1.38 | 32.64 | 1.54    | 11.02 | 0.21  | -1.36 | 2.08  | 13.72 | 1.81   | 295.08 | 4   | 2   | 3   | 2.12 | 475.64 |
| 17b | 243.40 | 1.73 | 1.41 | 38.70 | 2.58    | 16.19 | 0.36  | 7.76  | 3.01  | 19.01 | 1.31   | 342.10 | 4   | 2   | 5   | 3.77 | 552.80 |
| 17c | 229.50 | 1.68 | 1.34 | 34.47 | 1.60    | 11.19 | 0.21  | -2.10 | 1.87  | 14.37 | 1.79   | 309.09 | 4   | 2   | 3   | 2.62 | 507.33 |
| 17d | 259.70 | 1.72 | 1.37 | 40.61 | 3.06    | 18.84 | 0.44  | 9.56  | 4.41  | 19.81 | 1.26   | 356.12 | 4   | 2   | 5   | 4.26 | 581.98 |
| 17e | 235.60 | 1.68 | 1.38 | 35.16 | 1.81    | 13.49 | 0.26  | -1.36 | 2.47  | 16.46 | 1.83   | 325.09 | 5   | 2   | 4   | 2.22 | 521.65 |

|     |        |      |      |       |      |       |       |       |       |       |        |        |      |      |      |      |        |
|-----|--------|------|------|-------|------|-------|-------|-------|-------|-------|--------|--------|------|------|------|------|--------|
| 17f | 267.40 | 1.71 | 1.39 | 41.34 | 2.85 | 18.64 | 0.41  | 7.79  | 3.41  | 21.75 | 1.24   | 372.11 | 5    | 2    | 6    | 3.87 | 598.77 |
| 19a | 203.30 | 1.72 | 1.41 | 31.85 | 0.74 | 10.98 | 0.05  | 3.12  | -1.93 | 8.95  | -12.79 | 286.08 | 3    | 2    | 3    | 1.67 | 469.56 |
| 19b | 219.60 | 1.70 | 1.37 | 33.77 | 0.77 | 10.99 | 0.04  | 2.50  | -2.29 | 9.58  | -13.11 | 300.09 | 3.00 | 2.00 | 3.00 | 2.17 | 500.85 |
| 19c | 215.30 | 1.72 | 1.49 | 33.79 | 0.74 | 10.88 | 0.06  | 3.22  | -2.20 | 9.37  | -12.14 | 320.04 | 3.00 | 2.00 | 3.00 | 2.55 | 493.45 |
| 20a | 244.00 | 1.71 | 1.45 | 37.64 | 0.85 | 12.36 | 0.08  | 5.89  | -4.13 | 9.56  | -9.31  | 353.08 | 4.00 | 2.00 | 7.00 | 0.89 | 551.47 |
| 20b | 260.30 | 1.69 | 1.41 | 39.55 | 0.91 | 12.52 | 0.08  | 5.18  | -4.34 | 10.21 | -9.56  | 367.10 | 4.00 | 2.00 | 7.00 | 1.39 | 583.14 |
| 20c | 256.00 | 1.71 | 1.51 | 39.58 | 0.86 | 12.40 | 0.08  | 5.80  | -4.43 | 9.98  | -8.21  | 387.04 | 4.00 | 2.00 | 7.00 | 1.77 | 575.28 |
| 21a | 289.40 | 1.79 | 1.46 | 48.44 | 1.03 | 13.45 | 0.11  | -3.32 | -4.39 | 17.21 | -18.08 | 421.09 | 4.00 | 3.00 | 7.00 | 2.99 | 632.41 |
| 21b | 305.60 | 1.77 | 1.42 | 50.36 | 1.08 | 13.60 | 0.10  | -3.93 | -4.82 | 17.82 | -17.90 | 435.11 | 2.00 | 3.00 | 7.00 | 3.49 | 0.00   |
| 21c | 301.30 | 1.79 | 1.51 | 50.38 | 1.01 | 13.36 | 0.10  | -3.21 | -4.85 | 17.60 | -17.15 | 455.05 | 2.00 | 3.00 | 7.00 | 3.86 | 655.78 |
| 22a | 284.60 | 1.76 | 1.41 | 46.47 | 3.38 | 21.60 | -0.02 | 21.71 | 1.62  | 28.51 | -8.61  | 403.08 | 2.00 | 1.00 | 2.00 | 4.26 | 518.96 |
| 22b | 299.80 | 1.75 | 1.39 | 48.23 | 3.42 | 21.69 | -0.02 | 21.01 | 1.26  | 29.15 | -8.72  | 417.10 | 2.00 | 1.00 | 2.00 | 4.76 | 543.59 |
| 22c | 293.90 | 1.77 | 1.48 | 48.30 | 3.38 | 21.63 | -0.01 | 21.79 | 1.25  | 28.96 | -8.18  | 437.04 | 2.00 | 1.00 | 2.00 | 4.97 | 547.67 |

Table S2. continuation

|     | CMA    | MR    | LogS  | BI     | MTI  | PSA   | TC      | wi   | ET        | DM   | E <sub>HOMO</sub> | E <sub>LUMO</sub> | E <sub>gap</sub> | x    | μ     | η    | ω    |
|-----|--------|-------|-------|--------|------|-------|---------|------|-----------|------|-------------------|-------------------|------------------|------|-------|------|------|
| 3a  | 181.05 | 5.17  | -1.39 | 41807  | 2238 | 43.37 | 6.9E-03 | 301  | -17710.04 | 1.71 | -6.19             | -2.41             | 3.78             | 4.30 | -4.30 | 1.89 | 4.89 |
| 3b  | 187.01 | 5.76  | -1.87 | 41807  | 2238 | 34.14 | 6.9E-03 | 301  | -26498.79 | 0.96 | -6.28             | -2.50             | 3.78             | 4.39 | -4.39 | 1.89 | 5.10 |
| 5a  | 226.14 | 7.37  | -2.23 | 128856 | 4763 | 76.11 | 9.4E-04 | 652  | -32588.14 | 3.59 | -5.31             | -1.86             | 3.45             | 3.58 | -3.58 | 1.73 | 3.72 |
| 5b  | 272.70 | 8.47  | -3.07 | 256718 | 7003 | 78.62 | 3.8E-04 | 983  | -37348.83 | 5.58 | -4.99             | -1.51             | 3.48             | 3.25 | -3.25 | 1.74 | 3.03 |
| 5c  | 231.81 | 7.96  | -2.66 | 128856 | 4763 | 66.88 | 9.4E-04 | 652  | -41376.86 | 4.03 | -5.39             | -2.01             | 3.38             | 3.70 | -3.70 | 1.69 | 4.06 |
| 5d  | 278.72 | 9.07  | -3.49 | 256718 | 7003 | 69.39 | 3.8E-04 | 983  | -46137.56 | 5.85 | -5.05             | -1.67             | 3.38             | 3.36 | -3.36 | 1.69 | 3.34 |
| 6a  | 223.62 | 6.63  | -1.80 | 120455 | 4472 | 85.34 | 9.4E-04 | 609  | -23832.64 | 4.05 | -5.79             | -1.98             | 3.81             | 3.88 | -3.88 | 1.91 | 3.96 |
| 6b  | 225.88 | 6.64  | -1.88 | 120455 | 4397 | 79.55 | 9.4E-04 | 609  | -24373.25 | 7.77 | -5.98             | -1.71             | 4.27             | 3.84 | -3.84 | 2.14 | 3.46 |
| 6c  | 234.80 | 7.34  | -2.93 | 9546   | 4052 | 59.04 | 1.1E-03 | 535  | -31147.81 | 4.81 | -5.69             | -0.53             | 5.16             | 3.11 | -3.11 | 2.58 | 1.88 |
| 6d  | 231.52 | 7.13  | -2.87 | 95461  | 3983 | 72.25 | 1.1E-03 | 535  | -46130.76 | 6.46 | -6.01             | -0.69             | 5.32             | 3.35 | -3.35 | 2.66 | 2.11 |
| 8a  | 274.42 | 9.90  | -4.37 | 259095 | 8073 | 29.54 | 1.4E-04 | 1094 | -46130.76 | 4.72 | -5.25             | -2.16             | 3.09             | 3.71 | -3.71 | 1.55 | 4.45 |
| 8b  | 279.04 | 10.49 | -4.79 | 259095 | 8073 | 20.31 | 1.4E-04 | 1094 | -54919.50 | 4.01 | -5.29             | -2.28             | 3.01             | 3.78 | -3.78 | 1.51 | 4.76 |
| 10a | 171.13 | 6.17  | -2.32 | 57370  | 3030 | 72.00 | 2.0E-03 | 402  | -19607.80 | 2.35 | -5.14             | -0.83             | 4.31             | 2.99 | -2.99 | 2.15 | 2.07 |

|     |        |       |       |        |       |       |         |      |           |      |       |       |      |      |       |      |      |
|-----|--------|-------|-------|--------|-------|-------|---------|------|-----------|------|-------|-------|------|------|-------|------|------|
| 10b | 328.20 | 11.20 | -6.54 | 581104 | 15254 | 49.22 | 1.205   | 1968 | -32182.29 | 0.74 | -4.88 | -1.11 | 3.77 | 2.99 | -2.99 | 1.88 | 2.38 |
| 10c | 178.01 | 6.77  | -2.76 | 57370  | 3030  | 62.77 | 0.002   | 402  | -28396.28 | 2.49 | -5.28 | -1.07 | 4.21 | 3.17 | -3.17 | 2.11 | 2.39 |
| 10d | 332.81 | 11.79 | -6.96 | 581104 | 15254 | 39.99 | 1.205   | 1968 | -40970.84 | 0.85 | -4.85 | -1.09 | 3.76 | 2.97 | -2.97 | 1.88 | 2.34 |
| 12a | 190.89 | 5.74  | -2.28 | 57370  | 2915  | 63.41 | 2.0E-03 | 402  | -20687.32 | 3.27 | -5.69 | -1.51 | 4.17 | 3.60 | -3.60 | 2.09 | 3.11 |
| 12b | 197.59 | 6.34  | -2.71 | 57370  | 2915  | 54.18 | 2.0E-03 | 402  | -29475.94 | 3.46 | -5.77 | -1.69 | 4.08 | 3.73 | -3.73 | 2.04 | 3.42 |
| 14  | 181.03 | 4.45  | -1.04 | 28907  | 1498  | 43.37 | 2.4E-02 | 203  | -15583.15 | 1.84 | -6.00 | -1.40 | 4.60 | 3.70 | -3.70 | 2.30 | 2.97 |
| 16a | 210.95 | 6.25  | -2.35 | 84372  | 3577  | 46.17 | 3.4E-03 | 469  | -19277.68 | 1.68 | -5.91 | -1.73 | 4.18 | 3.82 | -3.82 | 2.09 | 3.48 |
| 16b | 230.01 | 6.71  | -2.70 | 114101 | 4304  | 46.17 | 2.8E-03 | 564  | -20347.64 | 2.18 | -5.78 | -1.66 | 4.12 | 3.72 | -3.72 | 2.06 | 3.35 |
| 16c | 237.97 | 6.87  | -2.40 | 152719 | 4966  | 55.40 | 2.0E-03 | 676  | -22394.01 | 3.45 | -5.56 | -1.55 | 4.01 | 3.55 | -3.55 | 2.00 | 3.15 |
| 17a | 255.13 | 8.45  | -3.34 | 219802 | 6885  | 78.91 | 4.7E-04 | 919  | -34155.64 | 3.07 | -5.06 | -1.38 | 3.68 | 3.22 | -3.22 | 1.84 | 2.82 |
| 17b | 303.24 | 9.55  | -4.19 | 406980 | 9641  | 81.42 | 1.9E-04 | 1319 | -38916.38 | 4.97 | -4.73 | -0.99 | 3.74 | 2.86 | -2.86 | 1.87 | 2.19 |
| 17c | 274.21 | 8.92  | -3.70 | 278685 | 8004  | 78.91 | 3.9E-04 | 1066 | -35225.59 | 2.57 | -4.99 | -1.33 | 3.67 | 3.16 | -3.16 | 1.83 | 2.72 |
| 17d | 322.02 | 10.02 | -4.54 | 501289 | 11015 | 81.42 | 1.6E-04 | 1502 | -39986.33 | 4.82 | -4.67 | -0.94 | 3.73 | 2.81 | -2.81 | 1.87 | 2.11 |
| 17e | 282.15 | 9.07  | -3.40 | 351436 | 8992  | 88.14 | 2.7E-04 | 1235 | -37271.94 | 1.62 | -4.88 | -1.24 | 3.64 | 3.06 | -3.06 | 1.82 | 2.57 |
| 17f | 330.25 | 10.17 | -4.24 | 615292 | 12207 | 90.65 | 1.1E-04 | 1710 | -42032.68 | 4.21 | -4.58 | -0.86 | 3.72 | 2.72 | -2.72 | 1.86 | 1.98 |
| 19a | 248.93 | 7.96  | -2.97 | 175434 | 5948  | 72.19 | 6.6E-04 | 805  | -33692.83 | 6.73 | -5.75 | -1.26 | 4.48 | 3.50 | -3.50 | 2.24 | 2.74 |
| 19b | 268.04 | 8.42  | -3.32 | 224578 | 6960  | 72.19 | 5.4E-04 | 939  | -34762.77 | 6.64 | -5.57 | -1.23 | 4.34 | 3.40 | -3.40 | 2.17 | 2.66 |
| 19c | 263.86 | 8.45  | -3.68 | 224578 | 6555  | 72.19 | 5.4E-04 | 939  | -46198.85 | 7.72 | -5.85 | -1.43 | 4.42 | 3.64 | -3.64 | 2.21 | 3.00 |
| 20a | 300.66 | 9.40  | -3.26 | 496961 | 10783 | 99.06 | 1.4E-04 | 1490 | -40356.60 | 4.36 | -6.05 | -1.54 | 4.51 | 3.80 | -3.80 | 2.25 | 3.20 |
| 20b | 319.79 | 9.86  | -3.61 | 604608 | 12216 | 99.06 | 1.1E-04 | 1681 | -41426.55 | 4.40 | -5.94 | -1.51 | 4.43 | 3.72 | -3.72 | 2.22 | 3.13 |
| 20c | 315.64 | 9.89  | -3.97 | 604608 | 11640 | 99.06 | 1.1E-04 | 1681 | -52862.63 | 5.20 | -6.15 | -1.67 | 4.48 | 3.91 | -3.91 | 2.24 | 3.41 |
| 21a | 353.15 | 12.19 | -5.54 | 845619 | 17054 | 70.23 | 1.968   | 2304 | -53358.46 | 5.51 | -5.78 | -1.65 | 4.13 | 3.71 | -3.71 | 2.07 | 3.34 |
| 21b | 0.00   | 12.66 | -5.89 | 998530 | 18937 | 70.23 | 1.607   | 2551 | -54428.41 | 5.80 | -5.75 | -1.61 | 4.13 | 3.68 | -3.68 | 2.07 | 3.28 |
| 21c | 368.48 | 12.69 | -6.24 | 998530 | 18193 | 70.23 | 1.607   | 2551 | -65864.48 | 4.38 | -5.87 | -1.76 | 4.12 | 3.82 | -3.82 | 2.06 | 3.53 |
| 22a | 284.06 | 11.93 | -5.24 | 535954 | 13596 | 44.70 | 1.607   | 1813 | -51278.37 | 5.26 | -5.71 | -1.39 | 4.32 | 3.55 | -3.55 | 2.16 | 2.91 |
| 22b | 298.86 | 12.40 | -5.59 | 637839 | 15189 | 44.70 | 1.312   | 2021 | -52347.95 | 3.89 | -4.29 | -1.29 | 2.99 | 2.79 | -2.79 | 1.50 | 2.60 |
| 22c | 302.57 | 12.43 | -5.95 | 637839 | 14562 | 44.70 | 1.312   | 2021 | -63784.01 | 3.10 | -5.76 | -1.53 | 4.23 | 3.64 | -3.64 | 2.12 | 3.14 |



Table S3. Correlation matrix generated by PCA analyses.

| Variables | MV   | n    | d    | ae   | Stretch | Bend | S-B  | Tor  | NVDW | VDW  | Dipole | MW   | HBA  | HBD  | RoB  | LogP | CCA  | CMA  | MR   | LogS | BI   | MTI  | PSA  | TC   | wi   | ET   | DM   | EHOMO | ELUMO | Egap | x    | $\mu$ | $\eta$ | $\omega$ |
|-----------|------|------|------|------|---------|------|------|------|------|------|--------|------|------|------|------|------|------|------|------|------|------|------|------|------|------|------|------|-------|-------|------|------|-------|--------|----------|
| MV        | 1.0  | 0.3  | 0.1  | 1.0  | 0.5     | 0.2  | 0.0  | 0.3  | -0.1 | 0.8  | -0.6   | 1.0  | -0.2 | 0.4  | 0.7  | 0.6  | 0.5  | 0.6  | 1.0  | -0.9 | 0.9  | 1.0  | 0.1  | 0.7  | 1.0  | -0.8 | 0.2  | 0.4   | 0.2   | -0.2 | -0.3 | 0.3   | -0.2   | -0.2     |
| n         | 0.3  | 1.0  | 0.5  | 0.4  | 0.1     | 0.1  | -0.2 | 0.0  | -0.1 | 0.2  | -0.4   | 0.4  | -0.2 | 0.4  | 0.2  | 0.4  | 0.1  | 0.1  | 0.5  | -0.5 | 0.4  | 0.4  | -0.1 | 0.4  | 0.4  | -0.5 | 0.0  | 0.1   | 0.1   | 0.0  | -0.1 | 0.1   | 0.0    | -0.1     |
| d         | 0.1  | 0.2  | 1.0  | 0.2  | -0.1    | 0.4  | -0.4 | 0.1  | -0.3 | -0.2 | -0.3   | 0.3  | 0.0  | 0.4  | 0.1  | 0.1  | 0.0  | 0.0  | 0.2  | -0.1 | 0.2  | 0.1  | 0.3  | 0.1  | 0.2  | -0.4 | 0.4  | 0.0   | -0.1  | 0.0  | 0.1  | -0.1  | 0.0    | 0.0      |
| ae        | 1.0  | 0.2  | 0.2  | 1.0  | 0.5     | 0.2  | -0.1 | 0.3  | -0.1 | 0.7  | -0.6   | 1.0  | -0.3 | 0.5  | 0.7  | 0.7  | 0.4  | 0.5  | 1.0  | -0.9 | 0.9  | 1.0  | 0.1  | 0.7  | 1.0  | -0.9 | 0.2  | 0.4   | 0.1   | -0.2 | -0.3 | 0.3   | -0.2   | -0.2     |
| Stretch   | 0.5  | 0.1  | -0.1 | 0.5  | 1.0     | 0.6  | 0.0  | 0.7  | 0.8  | 0.8  | 0.2    | 0.4  | -0.3 | -0.4 | -0.1 | 0.7  | 0.3  | 0.4  | 0.5  | -0.5 | 0.3  | 0.4  | -0.4 | 0.3  | 0.3  | -0.4 | -0.2 | 0.6   | -0.1  | -0.7 | -0.3 | 0.3   | -0.7   | 0.1      |
| Bend      | 0.2  | 0.1  | 0.4  | 0.2  | 0.6     | 1.0  | -0.3 | 0.4  | 0.5  | 0.3  | 0.2    | 0.2  | 0.0  | -0.3 | -0.2 | 0.5  | 0.1  | 0.1  | 0.2  | -0.3 | 0.1  | 0.2  | -0.3 | 0.2  | 0.1  | -0.2 | -0.2 | 0.5   | -0.2  | -0.6 | -0.2 | 0.2   | -0.6   | 0.1      |
| S-B       | 0.0  | -0.2 | -0.4 | -0.1 | 0.0     | -0.3 | 1.0  | 0.0  | 0.3  | 0.1  | 0.3    | -0.1 | 0.2  | 0.2  | 0.2  | -0.1 | 0.1  | 0.1  | -0.1 | 0.1  | 0.0  | -0.1 | 0.3  | -0.2 | 0.0  | 0.2  | -0.3 | 0.2   | 0.1   | -0.2 | -0.2 | 0.2   | -0.2   | -0.1     |
| Tor       | 0.3  | 0.0  | 0.1  | 0.3  | 0.7     | 0.5  | 0.0  | 1.0  | 0.5  | 0.4  | 0.1    | 0.3  | -0.5 | -0.5 | -0.2 | 0.3  | 0.2  | 0.2  | 0.3  | -0.2 | 0.0  | 0.1  | -0.3 | 0.1  | 0.1  | -0.4 | 0.1  | 0.2   | -0.2  | -0.4 | 0.0  | 0.0   | -0.4   | 0.2      |
| NVDW      | -0.1 | -0.1 | -0.3 | -0.1 | 0.8     | 0.6  | 0.3  | 0.7  | 1.0  | 0.4  | 0.6    | -0.1 | -0.1 | -0.5 | -0.4 | 0.3  | 0.1  | 0.1  | -0.1 | 0.0  | -0.2 | -0.2 | -0.4 | -0.2 | -0.2 | 0.2  | -0.5 | 0.6   | -0.2  | -0.8 | -0.2 | 0.2   | -0.8   | 0.2      |
| VDW       | 0.8  | 0.2  | -0.2 | 0.7  | 0.8     | 0.3  | 0.1  | 0.5  | 0.7  | 1.0  | -0.2   | 0.7  | -0.3 | 0.0  | 0.2  | 0.7  | 0.4  | 0.4  | 0.7  | -0.7 | 0.6  | 0.7  | -0.3 | 0.6  | 0.7  | -0.5 | -0.1 | 0.5   | 0.1   | -0.4 | -0.3 | 0.3   | -0.4   | -0.1     |
| Dipole    | -0.6 | -0.4 | -0.3 | -0.6 | 0.2     | 0.2  | 0.3  | 0.1  | 0.6  | -0.2 | 1.0    | -0.6 | 0.3  | -0.7 | -0.6 | -0.1 | -0.1 | -0.2 | -0.6 | 0.5  | -0.7 | -0.7 | -0.3 | -0.6 | -0.7 | 0.6  | -0.5 | 0.2   | -0.1  | -0.3 | -0.1 | 0.1   | -0.3   | 0.1      |
| MW        | 1.0  | 0.3  | 0.3  | 1.0  | 0.4     | 0.2  | -0.1 | 0.3  | -0.1 | 0.7  | -0.6   | 1.0  | -0.2 | 0.5  | 0.7  | 0.6  | 0.5  | 0.5  | 1.0  | -0.9 | 0.9  | 1.0  | 0.2  | 0.7  | 1.0  | -0.9 | 0.3  | 0.3   | 0.1   | -0.2 | -0.3 | 0.3   | -0.2   | -0.2     |
| HBA       | -0.2 | -0.2 | 0.0  | -0.3 | -0.3    | 0.0  | 0.2  | -0.5 | -0.1 | -0.3 | 0.3    | -0.2 | 1.0  | 0.3  | 0.1  | -0.3 | 0.1  | 0.1  | -0.3 | 0.3  | -0.2 | -0.2 | 0.6  | -0.3 | -0.2 | 0.5  | -0.1 | 0.2   | 0.4   | 0.1  | -0.4 | 0.4   | 0.1    | -0.4     |
| HBD       | 0.4  | 0.3  | 0.6  | 0.5  | -0.4    | -0.3 | 0.2  | -0.5 | -0.5 | 0.0  | -0.7   | 0.5  | 0.3  | 1.0  | 0.7  | 0.0  | 0.1  | 0.2  | 0.4  | -0.4 | 0.6  | 0.5  | 0.7  | 0.3  | 0.5  | -0.4 | 0.3  | 0.1   | 0.4   | 0.2  | -0.3 | 0.3   | 0.2    | -0.5     |
| RoB       | 0.7  | 0.2  | 0.1  | 0.7  | -0.1    | -0.2 | 0.2  | -0.2 | -0.4 | 0.2  | -0.6   | 0.7  | 0.1  | 0.7  | 1.0  | 0.1  | 0.4  | 0.4  | 0.6  | -0.5 | 0.8  | 0.7  | 0.6  | 0.3  | 0.7  | -0.5 | 0.3  | 0.0   | 0.2   | 0.1  | -0.1 | 0.1   | 0.1    | -0.2     |
| LogP      | 0.6  | 0.4  | 0.1  | 0.7  | 0.7     | 0.5  | -0.1 | 0.3  | 0.5  | 0.7  | -0.1   | 0.6  | -0.3 | 0.0  | 0.1  | 1.0  | 0.3  | 0.4  | 0.7  | -0.8 | 0.5  | 0.6  | -0.4 | 0.5  | 0.6  | -0.5 | -0.1 | 0.6   | 0.3   | -0.3 | -0.5 | 0.5   | -0.3   | -0.3     |
| CCA       | 0.5  | 0.1  | 0.0  | 0.4  | 0.3     | 0.1  | 0.1  | 0.2  | 0.1  | 0.4  | -0.1   | 0.5  | 0.1  | 0.1  | 0.4  | 0.3  | 1.0  | 1.0  | 0.4  | -0.4 | 0.3  | 0.4  | 0.2  | 0.1  | 0.4  | -0.4 | 0.1  | 0.3   | 0.2   | -0.1 | -0.3 | 0.3   | -0.1   | -0.2     |
| CMA       | 0.6  | 0.1  | 0.0  | 0.5  | 0.4     | 0.1  | 0.1  | 0.2  | 0.1  | 0.4  | -0.2   | 0.5  | 0.1  | 0.2  | 0.6  | 0.4  | 1.0  | 1.0  | 0.5  | -0.5 | 0.4  | 0.5  | 0.2  | 0.2  | 0.5  | -0.5 | 0.1  | 0.3   | 0.2   | -0.2 | -0.3 | 0.3   | -0.2   | -0.2     |
| MR        | 1.0  | 0.4  | 0.2  | 1.0  | 0.5     | 0.2  | -0.1 | 0.3  | -0.1 | 0.7  | -0.6   | 1.0  | -0.3 | 0.6  | 0.8  | 0.8  | 0.6  | 0.2  | 1.0  | -1.0 | 0.9  | 1.0  | 0.1  | 0.8  | 1.0  | -0.9 | 0.2  | 0.4   | 0.1   | -0.2 | -0.3 | 0.3   | -0.2   | -0.2     |
| LogS      | -0.9 | -0.5 | -0.1 | -0.9 | -0.5    | -0.3 | 0.1  | -0.2 | 0.0  | -0.7 | 0.5    | -0.9 | 0.3  | -0.4 | -0.5 | -0.8 | -0.4 | -0.5 | -1.0 | 1.0  | -0.8 | -0.9 | 0.1  | -0.8 | -0.9 | 0.8  | 0.0  | -0.4  | -0.2  | 0.2  | 0.4  | -0.4  | 0.2    | 0.2      |
| BI        | 0.9  | 0.4  | 0.2  | 0.9  | 0.3     | 0.1  | 0.0  | 0.0  | -0.2 | 0.6  | -0.7   | 0.9  | -0.2 | 0.6  | 0.8  | 0.5  | 0.5  | 0.4  | 0.9  | -0.8 | 1.0  | 1.0  | 0.2  | 0.8  | 1.0  | -0.8 | 0.2  | 0.2   | 0.1   | -0.1 | -0.2 | 0.2   | -0.1   | -0.2     |
| MTI       | 1.0  | 0.4  | 0.1  | 1.0  | 0.4     | 0.2  | -0.1 | 0.1  | -0.2 | 0.7  | -0.7   | 1.0  | -0.2 | 0.5  | 0.7  | 0.7  | 0.4  | 0.5  | 1.0  | -0.9 | 1.0  | 1.0  | 0.1  | 0.8  | 1.0  | -0.8 | 0.1  | 0.3   | 0.1   | -0.2 | -0.3 | 0.3   | -0.2   | -0.2     |
| PSA       | 0.1  | -0.1 | 0.3  | 0.1  | -0.4    | -0.3 | 0.3  | -0.3 | -0.4 | -0.3 | -0.3   | 0.2  | 0.6  | 0.7  | 0.6  | -0.4 | 0.2  | 0.2  | 0.1  | 0.1  | 0.2  | 0.1  | 1.0  | -0.2 | 0.2  | -0.1 | 0.4  | 0.1   | 0.3   | 0.2  | -0.2 | 0.2   | 0.2    | -0.4     |
| TC        | 0.7  | 0.3  | 0.1  | 0.7  | 0.3     | 0.2  | -0.2 | 0.1  | -0.2 | 0.6  | -0.6   | 0.7  | -0.3 | 0.3  | 0.3  | 0.5  | 0.1  | 0.2  | 0.8  | -0.8 | 0.8  | 0.8  | -0.2 | 1.0  | 0.8  | -0.6 | 0.0  | 0.1   | 0.0   | 0.0  | -0.1 | 0.1   | 0.0    | -0.1     |
| wi        | 1.0  | 0.3  | 0.2  | 1.0  | 0.3     | 0.1  | 0.0  | 0.1  | -0.2 | 0.7  | -0.7   | 1.0  | -0.2 | 0.5  | 0.7  | 0.6  | 0.4  | 0.5  | 1.0  | -0.9 | 1.0  | 1.0  | 0.2  | 0.3  | 1.0  | -0.8 | 0.2  | 0.3   | 0.1   | -0.1 | -0.2 | 0.2   | -0.1   | -0.2     |

|          |      |      |      |      |      |      |      |      |      |      |      |      |      |      |      |      |      |      |      |      |      |      |      |      |      |            |            |            |            |            |            |            |            |            |  |  |  |  |  |
|----------|------|------|------|------|------|------|------|------|------|------|------|------|------|------|------|------|------|------|------|------|------|------|------|------|------|------------|------------|------------|------------|------------|------------|------------|------------|------------|--|--|--|--|--|
| ET       | -0.8 | -0.5 | -0.4 | -0.9 | -0.4 | -0.2 | 0.2  | -0.4 | 0.2  | -0.5 | 0.6  | -0.9 | 0.5  | -0.4 | -0.5 | -0.5 | -0.4 | -0.5 | -0.9 | 0.8  | -0.8 | -0.8 | -0.1 | -0.2 | -0.9 | <b>1.0</b> | -0.4       | -0.1       | 0.0        | 0.1        | 0.1        | -0.1       | 0.1        | 0.0        |  |  |  |  |  |
| DM       | 0.2  | 0.0  | 0.8  | 0.2  | -0.2 | -0.2 | -0.3 | 0.1  | -0.5 | -0.1 | -0.5 | 0.3  | -0.1 | 0.3  | 0.3  | -0.1 | 0.1  | 0.1  | 0.2  | 0.0  | 0.2  | 0.1  | 0.4  | 0.0  | 0.2  | -0.4       | <b>1.0</b> | -0.1       | 0.1        | 0.3        | 0.0        | 0.0        | 0.3        | -0.1       |  |  |  |  |  |
| EHOMO    | 0.4  | 0.1  | 0.0  | 0.4  | 0.6  | 0.5  | 0.2  | 0.2  | 0.6  | 0.5  | 0.2  | 0.3  | 0.2  | 0.1  | 0.0  | 0.7  | 0.3  | 0.3  | 0.4  | -0.4 | 0.2  | 0.3  | 0.1  | 0.1  | 0.6  | -0.1       | -0.1       | <b>1.0</b> | 0.4        | -0.6       |            |            |            |            |  |  |  |  |  |
| ELUMO    | 0.2  | 0.1  | -0.1 | 0.1  | -0.1 | -0.2 | 0.1  | -0.2 | -0.2 | 0.1  | -0.1 | 0.1  | 0.4  | 0.4  | 0.2  | 0.3  | 0.2  | 0.2  | 0.1  | -0.2 | 0.1  | 0.1  | 0.3  | 0.0  | 0.1  | 0.0        | 0.1        | 0.4        | <b>1.0</b> | 0.5        |            |            |            |            |  |  |  |  |  |
| Egap     | -0.2 | 0.0  | 0.0  | -0.2 | -0.7 | -0.6 | -0.2 | -0.4 | -0.8 | -0.4 | -0.3 | -0.2 | 0.1  | 0.2  | 0.1  | -0.3 | -0.1 | -0.2 | -0.2 | 0.2  | -0.1 | -0.2 | 0.2  | 0.0  | -0.1 | 0.1        | 0.3        | -0.6       | 0.5        | <b>1.0</b> |            |            |            |            |  |  |  |  |  |
| x        | -0.3 | -0.1 | 0.1  | -0.3 | -0.3 | -0.2 | -0.2 | 0.0  | -0.2 | -0.3 | -0.1 | -0.3 | -0.4 | -0.3 | -0.1 | -0.5 | -0.3 | -0.3 | -0.3 | 0.4  | -0.2 | -0.3 | -0.2 | -0.1 | -0.2 | 0.1        | 0.0        | -0.9       | -0.8       | 0.1        | <b>1.0</b> |            |            |            |  |  |  |  |  |
| $\mu$    | 0.3  | 0.1  | -0.1 | 0.3  | 0.3  | 0.2  | 0.2  | 0.0  | 0.2  | 0.3  | 0.1  | 0.3  | 0.4  | 0.3  | 0.1  | 0.6  | 0.3  | 0.3  | 0.3  | -0.4 | 0.2  | 0.3  | 0.2  | 0.1  | 0.2  | -0.1       | 0.0        | 0.9        | 0.8        | -0.1       | -1.0       | <b>1.0</b> |            |            |  |  |  |  |  |
| $\eta$   | -0.2 | 0.0  | 0.0  | -0.2 | -0.7 | -0.6 | -0.2 | -0.4 | -0.8 | -0.4 | -0.3 | -0.2 | 0.1  | 0.2  | 0.1  | -0.3 | -0.1 | -0.2 | -0.2 | 0.2  | -0.1 | -0.2 | 0.2  | 0.0  | -0.1 | 0.1        | 0.3        | -0.6       | 0.5        | 1.0        | 0.1        | -0.1       | <b>1.0</b> |            |  |  |  |  |  |
| $\omega$ | -0.2 | -0.1 | 0.0  | -0.2 | 0.1  | 0.1  | -0.1 | 0.2  | 0.2  | -0.1 | 0.1  | -0.2 | -0.4 | -0.5 | -0.2 | -0.3 | -0.2 | -0.2 | -0.2 | 0.2  | -0.2 | -0.2 | -0.4 | -0.1 | -0.2 | 0.0        | -0.1       | -0.5       | -1.0       | -0.4       | 0.8        | -0.8       | -0.4       | <b>1.0</b> |  |  |  |  |  |

Table S4. Y-randomization test

| Model     | R        | R <sup>2</sup> | Q <sup>2</sup> |
|-----------|----------|----------------|----------------|
| Original  | 0.919239 | 0.849502       | 0.637215       |
| Random 1  | 0.562271 | 0.316149       | -0.51072       |
| Random 2  | 0.500554 | 0.250554       | -2.92671       |
| Random 3  | 0.562972 | 0.316937       | -0.42633       |
| Random 4  | 0.498081 | 0.248085       | -0.78709       |
| Random 5  | 0.560655 | 0.314334       | -0.3577        |
| Random 6  | 0.375947 | 0.141336       | -1.09184       |
| Random 7  | 0.414505 | 0.171814       | -0.92186       |
| Random 8  | 0.56627  | 0.320662       | -0.83537       |
| Random 9  | 0.44976  | 0.202284       | -2.48887       |
| Random 10 | 0.577905 | 0.333974       | -0.52828       |
| Random 11 | 0.604269 | 0.365141       | -0.39359       |
| Random 12 | 0.58246  | 0.339259       | -0.42915       |
| Random 13 | 0.552771 | 0.305556       | -0.67212       |
| Random 14 | 0.34803  | 0.121125       | -1.05833       |
| Random 15 | 0.545193 | 0.297235       | -1.59849       |
| Random 16 | 0.432948 | 0.187444       | -0.77693       |

|           |          |          |          |
|-----------|----------|----------|----------|
| Random 17 | 0.463728 | 0.215044 | -0.54455 |
| Random 18 | 0.712514 | 0.507676 | 0.073181 |
| Random 19 | 0.544496 | 0.296476 | -0.53499 |
| Random 20 | 0.523704 | 0.274266 | -0.57623 |
| Random 21 | 0.499014 | 0.249015 | -0.52583 |
| Random 22 | 0.504403 | 0.254422 | -0.79175 |
| Random 23 | 0.35815  | 0.128272 | -1.0279  |
| Random 24 | 0.545471 | 0.297539 | -1.19761 |
| Random 25 | 0.423384 | 0.179254 | -1.70443 |
| Random 26 | 0.445998 | 0.198914 | -1.25732 |
| Random 27 | 0.494131 | 0.244166 | -0.67882 |
| Random 28 | 0.708799 | 0.502396 | -0.11524 |
| Random 29 | 0.360453 | 0.129926 | -2.21103 |
| Random 30 | 0.450221 | 0.202699 | -0.88592 |
| Random 31 | 0.391635 | 0.153378 | -0.82959 |
| Random 32 | 0.601248 | 0.361499 | -0.84461 |
| Random 33 | 0.411347 | 0.169206 | -0.89074 |
| Random 34 | 0.491667 | 0.241736 | -0.57399 |
| Random 35 | 0.616555 | 0.38014  | -0.6623  |
| Random 36 | 0.540618 | 0.292267 | -2.8335  |
| Random 37 | 0.533226 | 0.28433  | -0.5478  |
| Random 38 | 0.429846 | 0.184767 | -2.22508 |
| Random 39 | 0.569186 | 0.323973 | -0.56803 |
| Random 40 | 0.652215 | 0.425384 | -0.13947 |
| Random 41 | 0.637915 | 0.406936 | -1.17984 |
| Random 42 | 0.500904 | 0.250905 | -0.91362 |
| Random 43 | 0.579826 | 0.336198 | -1.03692 |
| Random 44 | 0.4158   | 0.172889 | -0.84945 |
| Random 45 | 0.884647 | 0.7826   | 0.611637 |

|                                            |          |          |          |
|--------------------------------------------|----------|----------|----------|
| Random 46                                  | 0.470167 | 0.221057 | -0.62506 |
| Random 47                                  | 0.535329 | 0.286577 | -0.75863 |
| Random 48                                  | 0.569813 | 0.324687 | -1.27268 |
| Random 49                                  | 0.564393 | 0.31854  | -0.27371 |
| Random 50                                  | 0.689367 | 0.475227 | -0.24844 |
| <b>Random Models Parameters</b>            |          |          |          |
| Average R:                                 | 0.525095 |          |          |
| Average R <sup>2</sup> :                   | 0.286085 |          |          |
| Average Q <sup>2</sup> :                   | -0.88887 |          |          |
| <sup>c</sup> R <sub>p</sub> <sup>2</sup> : | 0.690867 |          |          |

**Table S5.** Similarity between the pIC<sub>50</sub> range of in vitro-observed cyclohexan-1,3-dione derivatives and that predicted in silico using MLR-QSAR and ANN-QSAR models..

|     | 2D-QSAR model descriptors |      |        |       |         |                |                   |                   | IC <sub>50</sub> (μM) | Obs(pIC <sub>50</sub> ) | pred(pIC <sub>50</sub> ) |       |
|-----|---------------------------|------|--------|-------|---------|----------------|-------------------|-------------------|-----------------------|-------------------------|--------------------------|-------|
|     | S-B                       | HBA  | CMA    | PSA   | TC      | E <sub>T</sub> | E <sub>HOMO</sub> | E <sub>LUMO</sub> |                       |                         | MLR                      | ANN   |
| 3a  | 0.14                      | 3.00 | 181.05 | 43.37 | 6.9E-03 | -17710.04      | -6.19             | -2.41             | 5.42                  | 5.26                    | 5.283                    | 5.244 |
| 3b  | 0.08                      | 4.00 | 226.14 | 76.11 | 9.4E-04 | -32588.14      | -5.31             | -1.86             | 0.39                  | 6.41                    | 6.035                    | 6.598 |
| 5a  | 0.22                      | 4.00 | 272.70 | 78.62 | 3.8E-04 | -37348.83      | -4.99             | -1.51             | 4.18                  | 5.38                    | 5.412                    | 5.291 |
| 5b  | 0.24                      | 3.00 | 231.81 | 66.88 | 9.4E-04 | -41376.86      | -5.39             | -2.01             | 1.17                  | 5.93                    | 5.667                    | 5.923 |
| 5c  | 0.35                      | 3.00 | 278.72 | 69.39 | 3.8E-04 | -46137.56      | -5.05             | -1.67             | 0.26                  | 6.59                    | 6.084                    | 6.557 |
| 5d  | 0.04                      | 5.00 | 223.62 | 85.34 | 9.4E-04 | -23832.64      | -5.79             | -1.98             | 0.36                  | 6.44                    | 6.277                    | 6.332 |
| 6a  | -0.12                     | 5.00 | 225.88 | 79.55 | 9.4E-04 | -24373.25      | -5.98             | -1.71             | 5.73                  | 5.24                    | 5.200                    | 5.222 |
| 6c  | -0.03                     | 3.00 | 234.80 | 59.04 | 1.1E-03 | -31147.81      | -5.69             | -0.53             | 0.82                  | 6.43                    | 6.814                    | 6.398 |
| 8a  | -0.25                     | 2.00 | 274.42 | 29.54 | 1.4E-04 | -46130.76      | -5.25             | -2.16             | 0.37                  | 6.55                    | 6.362                    | 6.558 |
| 8b  | -0.11                     | 1.00 | 279.04 | 20.31 | 1.4E-04 | -54919.50      | -5.29             | -2.28             | 0.42                  | 6.54                    | 6.988                    | 6.457 |
| 10b | 0.03                      | 5.00 | 328.20 | 49.22 | 1.2     | -32182.29      | -4.88             | -1.11             | 0.28                  | 5.42                    | 5.470                    | 5.422 |
| 10d | 0.12                      | 4.00 | 332.81 | 39.99 | 1.2     | -40970.84      | -4.85             | -1.09             | 0.29                  | 6.24                    | 6.039                    | 6.199 |
| 12a | -0.02                     | 5.00 | 190.89 | 63.41 | 2.0     | -20687.32      | -5.69             | -1.51             | 7.6                   | 5.97                    | 6.195                    | 5.932 |
| 14  | 0.27                      | 3.00 | 181.03 | 43.37 | 2.4E-02 | -15583.15      | -6.00             | -1.40             | 3.8                   | 5.17                    | 5.538                    | 5.132 |
| 16a | 0.26                      | 3.00 | 210.95 | 46.17 | 3.4E-03 | -19277.68      | -5.91             | -1.73             | 0.43                  | 5.27                    | 5.419                    | 5.375 |
| 16b | 0.26                      | 3.00 | 230.01 | 46.17 | 2.8E-03 | -20347.64      | -5.78             | -1.66             | 0.58                  | 5.14                    | 5.363                    | 5.096 |
| 16c | 0.32                      | 4.00 | 237.97 | 55.40 | 2.0E-03 | -22394.01      | -5.56             | -1.55             | 1.06                  | 6.17                    | 5.983                    | 6.335 |
| 17a | 0.21                      | 4.00 | 255.13 | 78.91 | 4.7E-04 | -34155.64      | -5.06             | -1.38             | 0.36                  | 5.20                    | 5.498                    | 5.168 |
| 17b | 0.36                      | 4.00 | 303.24 | 81.42 | 1.9E-04 | -38916.38      | -4.73             | -0.99             | 6.7                   | 5.34                    | 5.775                    | 5.499 |

|                         |       |      |        |       |          |           |       |       |      |      |       |       |
|-------------------------|-------|------|--------|-------|----------|-----------|-------|-------|------|------|-------|-------|
| 17c                     | 0.21  | 4.00 | 274.21 | 78.91 | 3.9E-04  | -35225.59 | -4.99 | -1.33 | 5.41 | 5.58 | 5.475 | 5.427 |
| 17d                     | 0.44  | 4.00 | 322.02 | 81.42 | 1.6E-04  | -39986.33 | -4.67 | -0.94 | 7.24 | 5.78 | 5.886 | 5.649 |
| 17e                     | 0.26  | 5.00 | 282.15 | 88.14 | 2.7E-04  | -37271.94 | -4.88 | -1.24 | 0.68 | 6.29 | 6.167 | 6.254 |
| 17f                     | 0.41  | 5.00 | 330.25 | 90.65 | 1.1E-04  | -42032.68 | -4.58 | -0.86 | 6.28 | 6.48 | 6.469 | 6.599 |
| 19a                     | 0.05  | 3.00 | 248.93 | 72.19 | 6.6E-04  | -33692.83 | -5.75 | -1.26 | 4.61 | 5.08 | 5.194 | 5.209 |
| 19c                     | 0.06  | 3.00 | 263.86 | 72.19 | 5.4E-04  | -46198.85 | -5.85 | -1.43 | 2.63 | 6.49 | 6.466 | 6.461 |
| 20b                     | 0.08  | 4.00 | 319.79 | 99.06 | 1.1E-04  | -41426.55 | -5.94 | -1.51 | 1.65 | 5.24 | 5.281 | 5.390 |
| 20c                     | 0.08  | 4.00 | 315.64 | 99.06 | 1.1E-04  | -52862.63 | -6.15 | -1.67 | 0.51 | 6.46 | 6.630 | 6.429 |
| 21a                     | 0.11  | 4.00 | 353.15 | 70.23 | 2.0      | -53358.46 | -5.78 | -1.65 | 0.33 | 5.19 | 5.175 | 5.096 |
| 21b                     | 0.10  | 2.00 | 0.00   | 70.23 | 1.6      | -54428.41 | -5.75 | -1.61 | 8.29 | 5.79 | 5.858 | 5.739 |
| 21c                     | 0.10  | 2.00 | 368.48 | 70.23 | 1.6      | -65864.48 | -5.87 | -1.76 | 2.28 | 5.06 | 5.018 | 5.210 |
| 22a                     | -0.02 | 2.00 | 284.06 | 44.70 | 1.6      | -51278.37 | -5.71 | -1.39 | 0.32 | 5.08 | 5.068 | 5.124 |
| 22c                     | -0.01 | 2.00 | 302.57 | 44.70 | 1.3      | -63784.01 | -5.76 | -1.53 | 7.62 | 6.54 | 6.681 | 6.448 |
| 6b*                     | 0.33  | 2.00 | 187.01 | 34.14 | 6.9E-03  | -26498.79 | -6.28 | -2.50 | 5.72 | 6.09 | 5.950 | 6.206 |
| 6d*                     | -0.04 | 3    | 231.52 | 53.25 | 1.10E-03 | -36130.76 | -6.01 | -0.69 | 0.35 | 6.38 | 6.888 | 6.354 |
| 10a*                    | -0.07 | 5.00 | 171.13 | 72.00 | 2.0E-03  | -19607.80 | -5.14 | -0.83 | 6.39 | 5.12 | 5.578 | 5.050 |
| 10c*                    | 0.09  | 4.00 | 178.01 | 62.77 | 2.0E-03  | -28396.28 | -5.28 | -1.07 | 1.64 | 6.37 | 6.248 | 6.342 |
| 12b*                    | 0.09  | 4.00 | 197.59 | 54.18 | 2.0E-03  | -29475.94 | -5.77 | -1.69 | 8.69 | 6.44 | 6.786 | 6.446 |
| 19b*                    | 0.04  | 3.00 | 268.04 | 72.19 | 5.4E-04  | -34762.77 | -5.57 | -1.23 | 8.25 | 5.64 | 5.343 | 5.575 |
| 20a*                    | 0.08  | 4.00 | 300.66 | 99.06 | 1.4E-04  | -40356.60 | -6.05 | -1.54 | 2.37 | 5.12 | 5.343 | 5.128 |
| 22b*                    | -0.02 | 2.00 | 298.86 | 44.70 | 1.3E+00  | -52347.95 | -4.29 | -1.29 | 0.29 | 5.63 | 5.462 | 5.768 |
| * Items of the test set |       |      |        |       |          |           |       |       |      |      |       |       |

**Table S6.** Molecular descriptor sizes and pIC<sub>50</sub> range predicted using the optimal QSAR model for the designed novel cyclohexan-1,3-dione derivatives.

|            | 2D-QSAR model descriptors |     |         |       |         |            |                   |                   | pred(pIC50) |
|------------|---------------------------|-----|---------|-------|---------|------------|-------------------|-------------------|-------------|
|            | S-B                       | HBA | CMA     | PSA   | TC      | ET         | E <sub>HOMO</sub> | E <sub>LUMO</sub> | MLR         |
| <b>H01</b> | -0.0995                   | 5   | 235.517 | 75.34 | 9.5E-04 | -33833.326 | -6.35             | -1.53             | 7.06        |
| H02        | -0.189                    | 4   | 242.169 | 76.11 | 9.5E-04 | -42622     | -5.95             | -1.6              | 6.50        |
| H03        | -0.0144                   | 4   | 250.114 | 76.11 | 6.7E-04 | -33893.9   | -6.03             | -1.56             | 5.88        |
| H04        | -0.0167                   | 4   | 269.405 | 76.11 | 5.5E-04 | -34963.73  | -5.91             | -1.51             | 5.81        |
| H05        | -0.0189                   | 5   | 276.958 | 85.34 | 3.9E-04 | -37010.03  | -5.67             | -1.49             | 6.30        |
| <b>H06</b> | -0.0113                   | 4   | 265.181 | 75.11 | 5.5E-04 | -46400.14  | -6.17             | -1.71             | 7.22        |
| H07        | -0.0113                   | 5   | 281.959 | 87.85 | 3.9E-04 | -38594.28  | -5.49             | -1.23             | 6.30        |
| H08        | -0.183                    | 4   | 287.916 | 78.62 | 3.9E-04 | -37382.98  | -5.65             | -1.3              | 5.47        |
| H09        | -0.183                    | 4   | 296.708 | 78.62 | 2.7E-04 | -38654.7   | -5.8              | -1.26             | 5.69        |
| H10        | -0.0107                   | 4   | 315.887 | 78.62 | 9.6E-06 | -39724.84  | -5.72             | -1.23             | 5.92        |

|            |          |   |         |       |         |           |       |       |             |
|------------|----------|---|---------|-------|---------|-----------|-------|-------|-------------|
| H11        | -0.0133  | 5 | 323.218 | 87.85 | 1.6E-04 | -31771.25 | -5.39 | -1.19 | 5.28        |
| <b>H12</b> | -0.0065  | 4 | 311.964 | 58.62 | 2.2E-04 | -41161.12 | -5.92 | -1.4  | 7.19        |
| H13        | -0.0929  | 5 | 231.496 | 79.55 | 9.5E-04 | -24373.62 | -5.97 | -1.72 | 5.50        |
| H14        | -0.182   | 4 | 238.369 | 70.32 | 9.4E-04 | -33162.29 | -6.13 | -1.78 | 5.87        |
| H15        | -0.006   | 4 | 246.324 | 70.32 | 6.7E-04 | -24434.2  | -6.34 | -1.74 | 5.34        |
| H16        | -0.0084  | 4 | 265.524 | 70.32 | 5.5E-04 | -26483.76 | -6.22 | -1.74 | 5.36        |
| H17        | -0.0082  | 5 | 271.907 | 79.55 | 3.8E-04 | -27398.61 | -5.73 | -1.7  | 5.56        |
| <b>H18</b> | -0.0041  | 4 | 261.531 | 70.32 | 5.5E-04 | -39940.29 | -6.46 | -1.73 | 7.01        |
| H19        | -0.09    | 5 | 279.905 | 82.06 | 3.8E-04 | -29134.42 | -5.65 | -1.89 | 5.30        |
| <b>H20</b> | -0.18    | 4 | 286.306 | 62.83 | 3.8E-04 | -47923.16 | -5.81 | -1.41 | 7.49        |
| <b>H21</b> | -0.005   | 4 | 293.666 | 62.83 | 2.7E-04 | -39195.07 | -6.16 | -1.48 | 7.02        |
| H22        | -0.0067  | 4 | 312.825 | 62.83 | 2.2E-04 | -30265.04 | -6.02 | -1.49 | 5.84        |
| H23        | -0.0091  | 5 | 320.428 | 82.06 | 1.6E-04 | -32311.36 | -5.61 | -1.45 | 5.70        |
| <b>H24</b> | -0.00267 | 4 | 308.982 | 68.83 | 2.2E-04 | -44701.47 | -6.27 | -1.43 | 7.32        |
| H25        | -0.00448 | 5 | 224.427 | 82.68 | 9.5E-04 | -33801.13 | -6.22 | -1.63 | 6.76        |
| H26        | -0.0046  | 4 | 234.812 | 63.45 | 1.10E-5 | -33589.81 | -6.18 | -2.05 | 6.49        |
| H27        | 0.8214   | 4 | 243.926 | 73.45 | 6.6E-04 | -23861.73 | -6.37 | -1.88 | 6.41        |
| H28        | 0.8214   | 4 | 244.664 | 73.45 | 5.4E-04 | -24931.71 | -6.22 | -1.81 | 6.44        |
| H29        | 0.8214   | 5 | 270.182 | 82.68 | 3.8E-04 | -26978.15 | -5.84 | -1.83 | 6.70        |
| <b>H30</b> | 0.8214   | 4 | 259.138 | 73.45 | 5.4E-04 | -36367.94 | -6.42 | -2.04 | 7.62        |
| <b>H31</b> | 0.8214   | 5 | 273.294 | 82.19 | 3.8E-04 | -28661.91 | -5.94 | -1.63 | 7.05        |
| <b>H32</b> | 0.8214   | 4 | 281.39  | 75.96 | 3.8E-04 | -37350.58 | -5.96 | -1.64 | 7.31        |
| H33        | 0.8214   | 4 | 292.914 | 75.96 | 2.7E-04 | -28622.48 | -6.1  | -1.51 | 6.47        |
| H34        | 0.8214   | 4 | 311.347 | 75.96 | 2.2E-04 | -29692.45 | -5.96 | -1.48 | 6.39        |
| H35        | 0.8214   | 5 | 318.565 | 85.19 | 1.5E-04 | -31738.88 | -5.63 | -1.46 | 6.81        |
| <b>H36</b> | 0.8214   | 4 | 308.372 | 71.96 | 2.2E-04 | -41128.7  | -6.18 | -1.66 | 7.92        |
| *6d        | -0.04    | 3 | 231.52  | 53.25 | 1.1E-03 | -36130.76 | -6.01 | -0.69 | <b>6.88</b> |

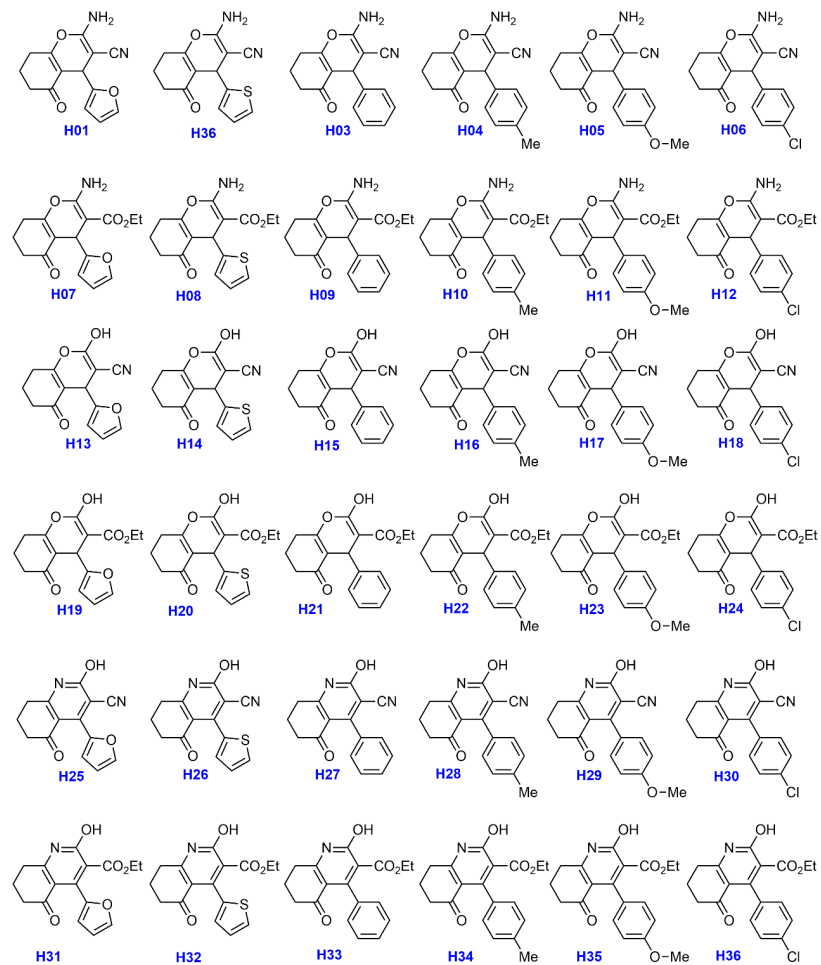

**Figure S1.** Heterocyclic structures of the 36 designed compounds (H01-H36) based on scaffold 6d.

3LQ8\_H01\_minimized

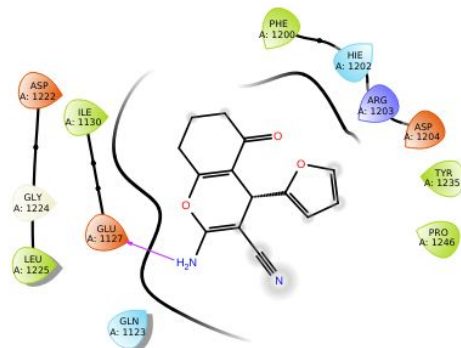

Charged (negative)  
Charged (positive)  
Glycine  
Hydrophobic  
Metal

Polar  
Unspecified residue  
Water  
Hydration site  
Hydration site (displaced)  
Distance  
H-bond  
Halogen bond  
Metal coordination  
Pi-Pi stacking

Pi-cation  
Salt bridge  
Solvent exposure

H01-3LQ8 : (A)

3LQ8\_H06\_MMGBSA

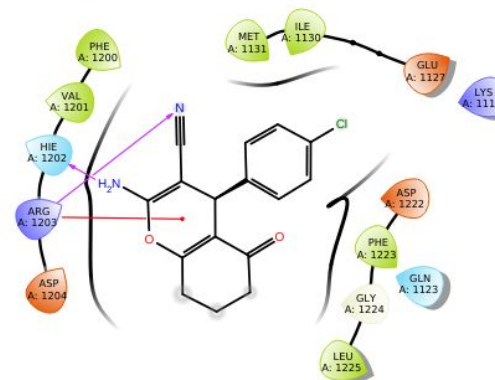

Charged (negative)  
Charged (positive)  
Glycine  
Hydrophobic  
Metal

Polar  
Unspecified residue  
Water  
Hydration site  
Hydration site (displaced)  
Distance  
H-bond  
Halogen bond  
Metal coordination  
Pi-Pi stacking

Pi-cation  
Salt bridge  
Solvent exposure

H06-3LQ8 : (B)



3LQ8\_H12\_MMGBSA

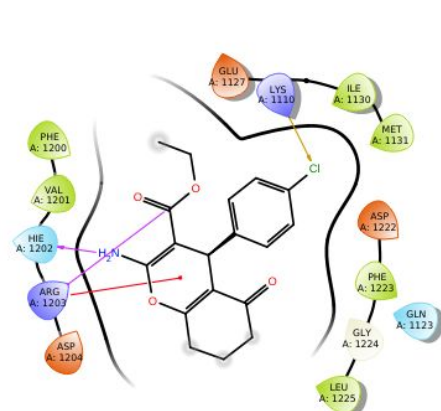

charged (negative)  
charged (positive)  
lysine  
hydrophobic  
metal

Polar  
Unspecified residue  
Water  
Hydration site  
Hydration site (displaced)  
Distance  
H-bond  
Halogen bond  
Metal coordination  
Pi-Pi stacking

Pi-cation  
Salt bridge  
Solvent exposure

arged (negative)  
arged (positive)  
ine  
rophobic  
al

**H12-3LQ8 :(C)**

3LQ8\_H18\_MMGBSA

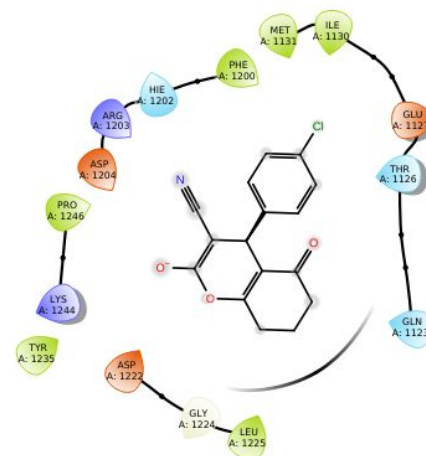

Polar  
Unspecified residue  
Water  
Hydration site  
Hydration site (displaced)  
Distance  
H-bond  
Halogen bond  
Metal coordination  
Pi-Pi stacking

Pi-cation  
Salt bridge  
Solvent exposure

**H18-3LQ8 :(D)**

3LQ8\_H20\_MMGBSA

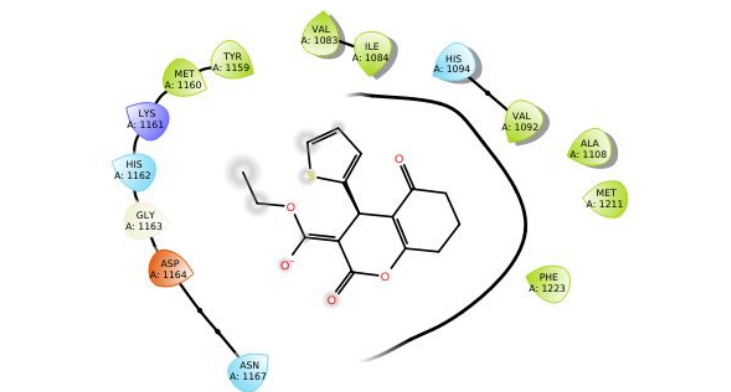

arged (negative)  
arged (positive)  
cine  
drophobic  
tal

Polar  
Unspecified residue  
Water  
Hydration site  
Hydration site (displaced)  
Distance  
H-bond  
Halogen bond  
Metal coordination  
Pi-Pi stacking

Pi-cation  
Salt bridge  
Solvent exposure

harged (negative)  
harged (positive)  
lycine  
hydrophobic  
fetal

**H20-3LQ8 :(E)**

3LQ8\_H21\_MMGBSA

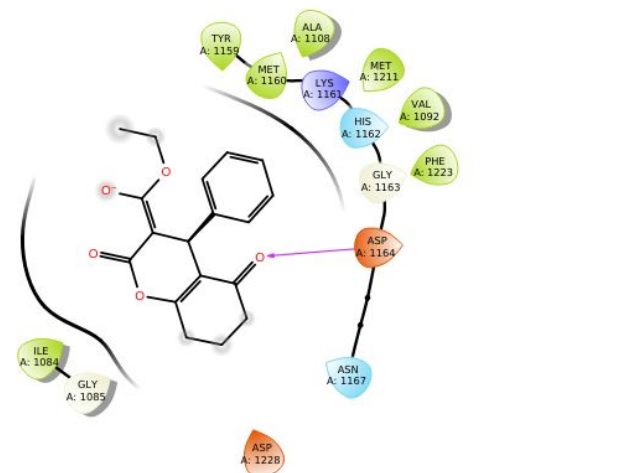

harged (negative)  
harged (positive)  
lycine  
hydrophobic  
fetal

Polar  
Unspecified residue  
Water  
Hydration site  
Hydration site (displaced)  
Distance  
H-bond  
Halogen bond  
Metal coordination  
Pi-Pi stacking

Pi-cation  
Salt bridge  
Solvent exposure

**H21-3LQ8 :(F)**

3LQ8\_H24\_MMGBSA

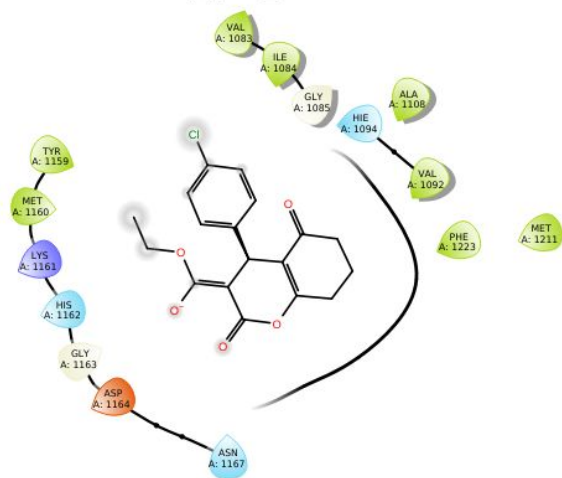

charged (negative)  
charged (positive)  
glycine  
hydrophobic  
metal

Polar  
Unspecified residue  
Water  
Hydration site  
Hydration site (displaced)  
Distance  
H-bond  
Halogen bond  
Metal coordination  
Pi-Pi stacking

• Pi-cation  
- Salt bridge  
○ Solvent exposure

arged (negative)  
arged (positive)  
ine  
rophobic  
al

**H24 : (G)**

3LQ8\_H30\_MMGBSA

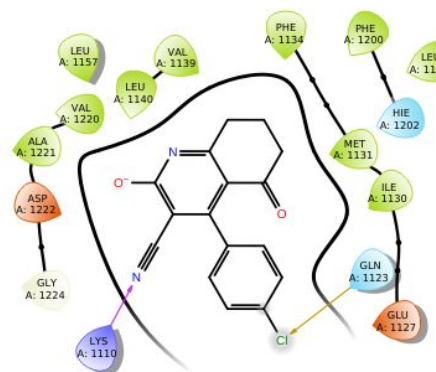

Polar  
Unspecified residue  
Water  
Hydration site  
Hydration site (displaced)

Distance  
H-bond  
Halogen bond  
Metal coordination  
Pi-Pi stacking

• Pi-cation  
- Salt bridge  
○ Solvent exposure

**H30 : (H)**

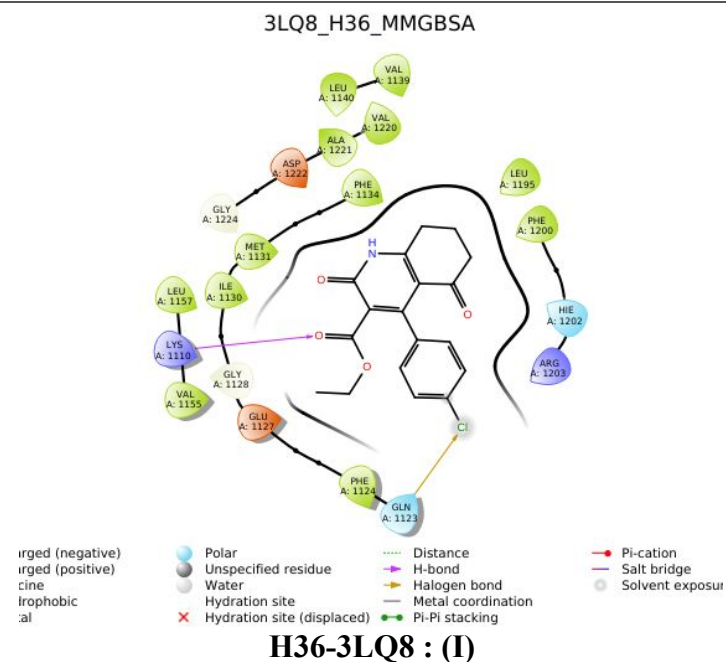

**Figure S2.** The key interactions predicted from MM-GBSA simulation between 3LQ8 and the designed compounds (A) H01, (B) H06, (C) H12, (D) H18, (E) H20, (F) H21, (G) H24, (H) H30, (I) H36.
